# Supplementary material for: RFWD3 Participates in the Occurrence and Development of Colorectal Cancer via E2F1 Transcriptional Regulation of BIRC5
Source: PubMed Central journal article supplement (PMC8547426; doi:10.3389/fcell.2021.675356), 2021-10-12
Supplement: Data_Sheet_1.pdf [file Data_Sheet_1.pdf]

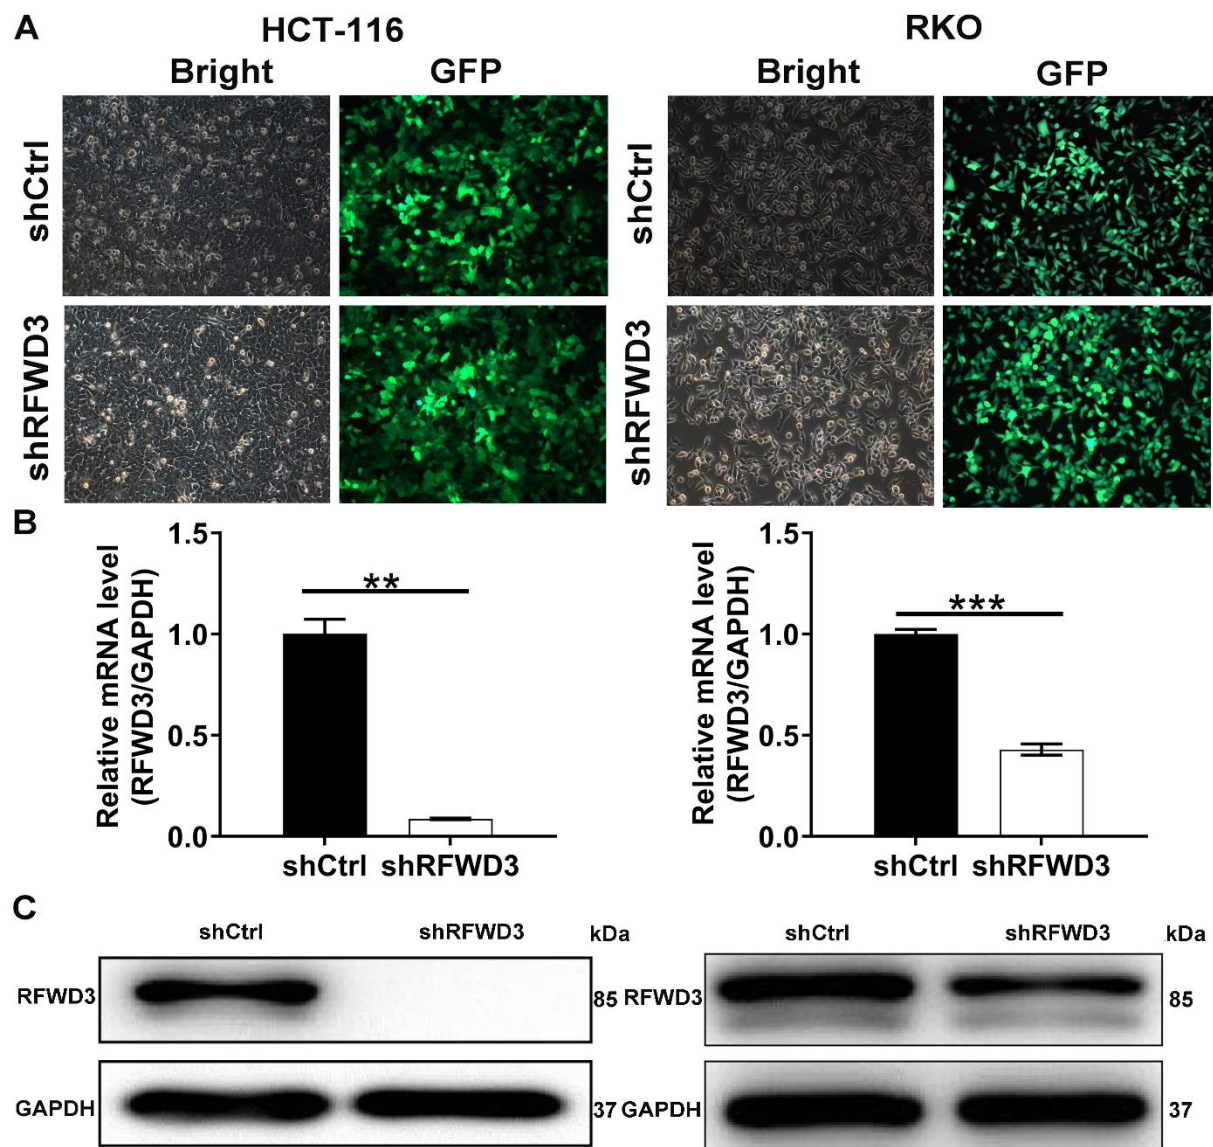

**Figure S1.** (A) The infection efficiencies of shRFWD3-1 in HCT 116 and RKO cells were evaluated through observing the fluorescence inside cells. Magnification times: 200 ×. (B) The RFWD3 expression in colorectal cancer cell lines after infection was analyzed by qRT-PCR. (C) The expression of RFWD3 protein in colorectal cancer cell lines after infection was detected by western blot.

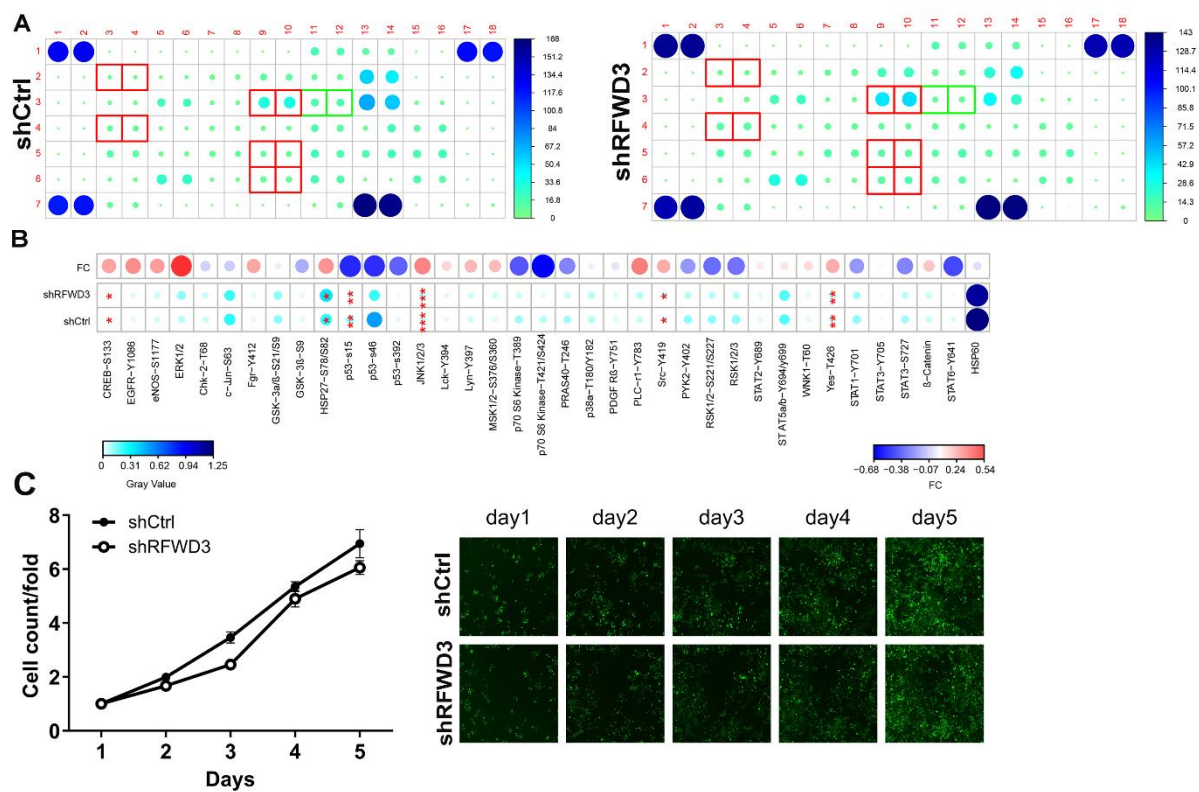

**Figure S2.** (A, B) The levels of phosphorylation-related proteins in RKO cells infected with shCtrl and shRFWD3 were measured using a human phosphorylation array. Protein expression was visualized by R studio. (C) The cell proliferation of FHC cells after infecting shCtrl and shRFWD3 was evaluated via Celigo cell counting assay. Results were presented as mean  $\pm$  SD.

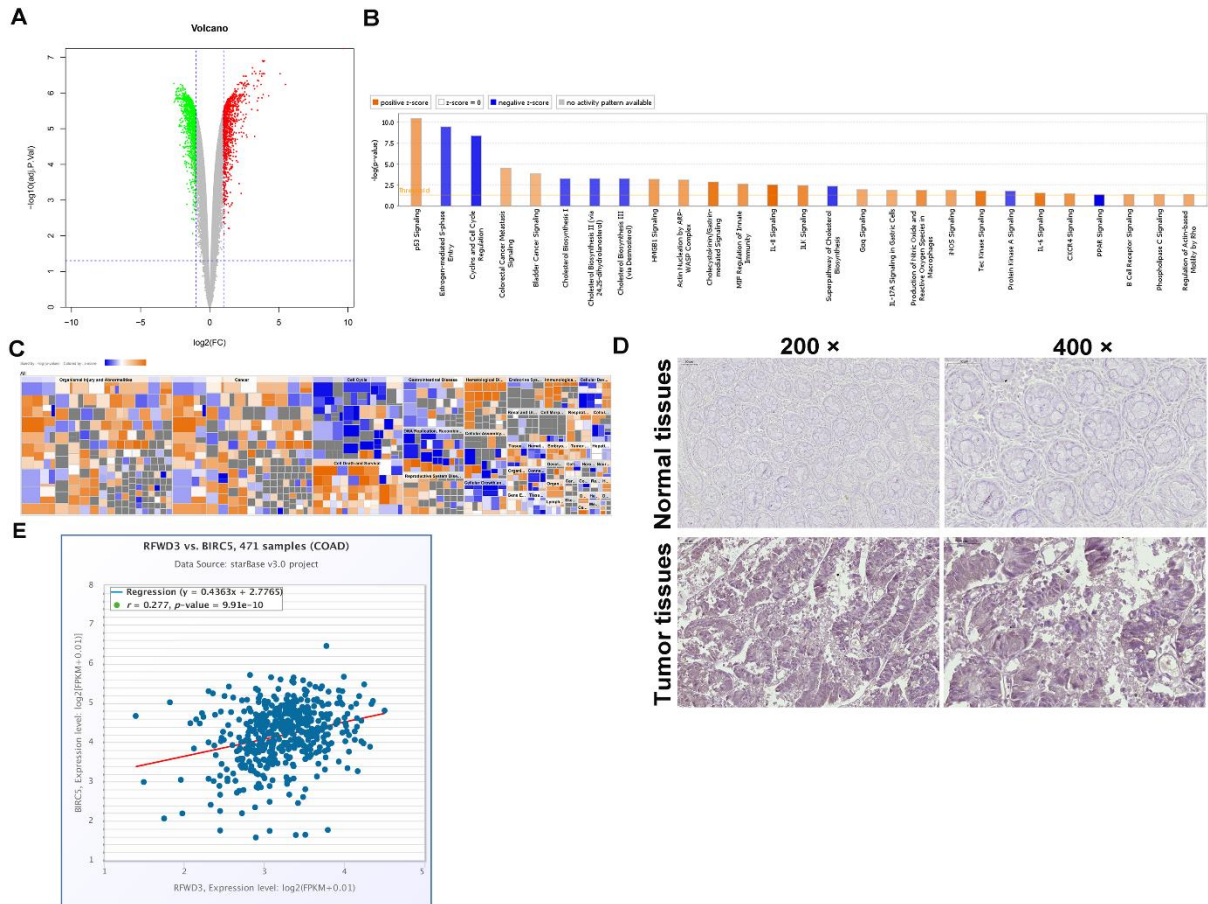

**Figure S3.** (A) The volcano plot of gene expression profiling in HCT 116 cells with or without RFWD3 knockdown. Red dots represent the upregulated DEGs, green dots represent the downregulated DEGs. (B, C) The enrichment of the DEGs in canonical signaling pathways (B) and IPA disease and function (C) was analyzed by IPA. (D) The expression levels of BIRC5 in colorectal cancer tumor tissues and para-carcinoma tissues were determined by immunohistochemical staining. (E) A positive correlation between RFWD3 level and BIRC5 expression was observed in ENCORI Pan-Cancer Analysis Platform.

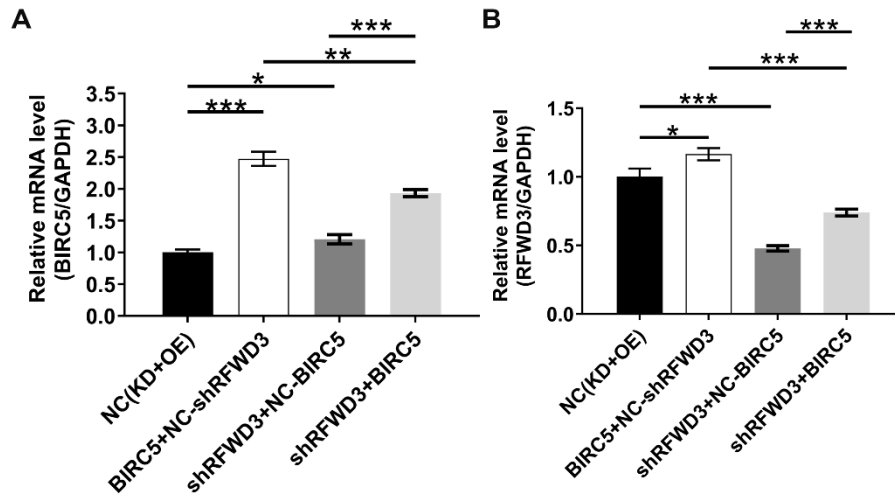

**Figure S4.** The mRNA levels of BIRC5 (A) and RFWD3 (B) were detected in RKO cell models after infection. NC (OE+KD) as negative control; BIRC5+NC-shRFWD3 as overexpressed BIRC5; shRFWD3+NC-BIRC5 as RFWD3 downregulation; BIRC5+shRFWD3 as simultaneously downregulated RFWD3 and overexpressed BIRC5. \*  $P < 0.05$ , \*\*  $P < 0.01$ , \*\*\*  $P < 0.001$ .

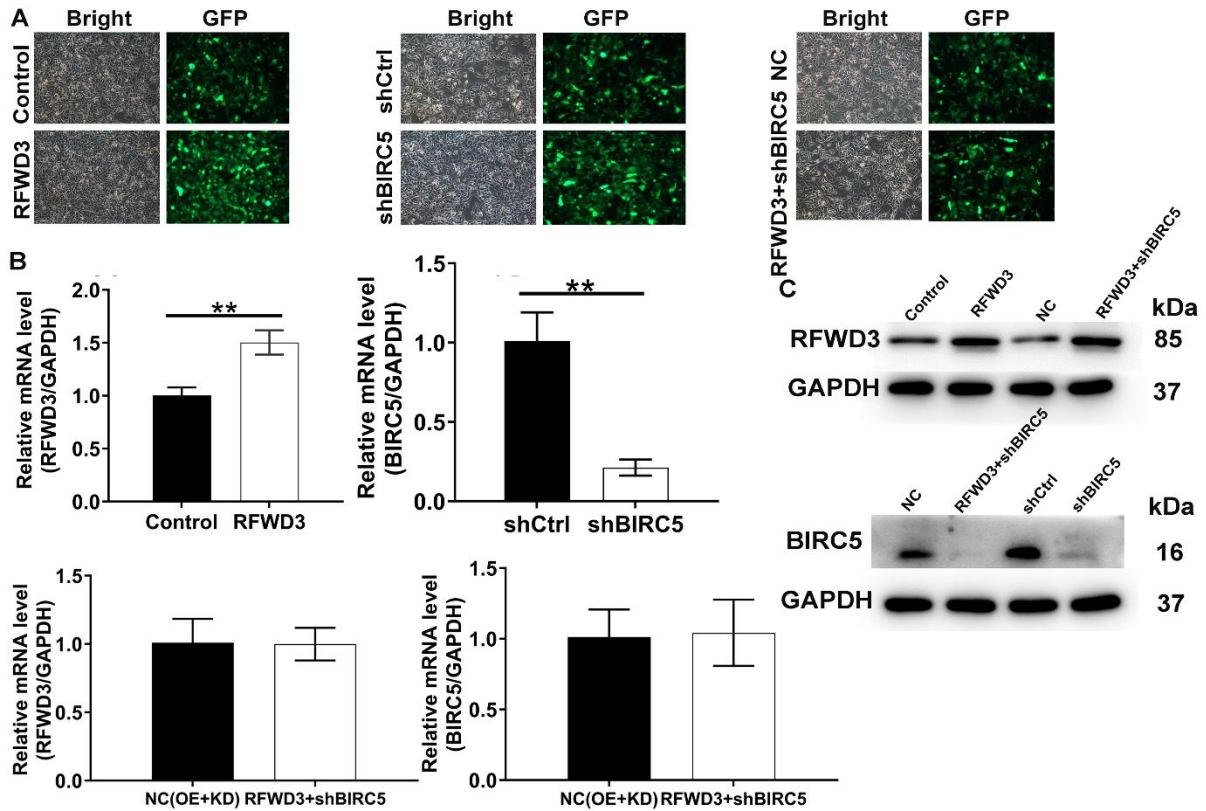

**Figure S5.** (A) The infection efficiencies of RFWD3, shBIRC5 and shBIRC5+ RFWD3 in RKO cells were evaluated through observing the fluorescence inside cells. Magnification times: 200 $\times$ . (B) The RFWD3 and BIRC5 mRNA expression in RKO cell lines after infecting RFWD3, shBIRC5 and shBIRC5+ RFWD3 was analyzed by qRT-PCR. (C) The RFWD3 and BIRC5 protein expression in RKO cell lines after infecting RFWD3, shBIRC5 and shBIRC5+ RFWD3 was analyzed by western blot. \*\*  $P < 0.01$ .

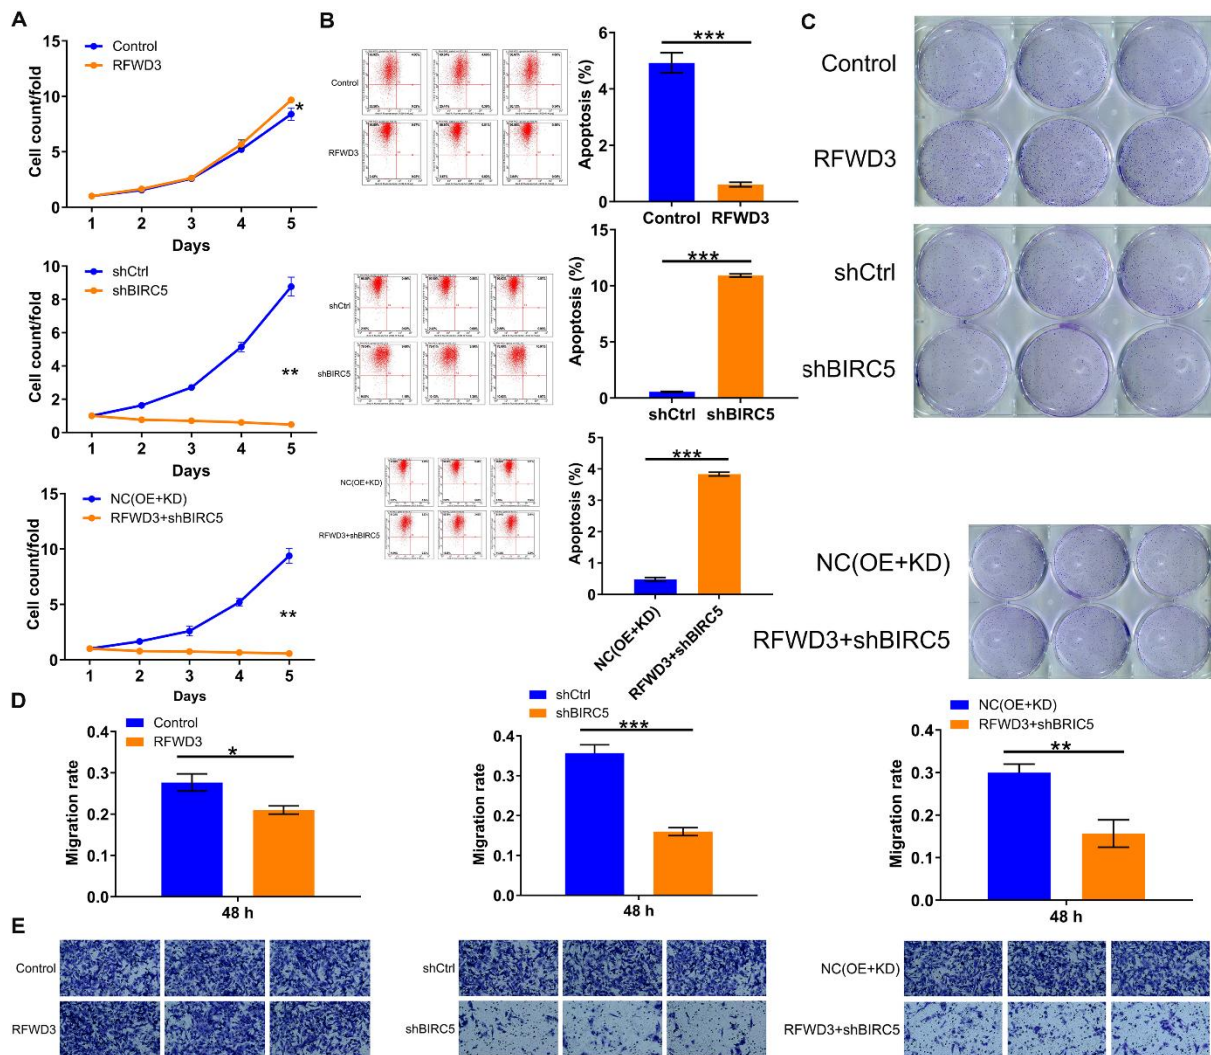

**Figure S6.** (A, B) Celigo cell counting assay (A) and the flow cytometry (B) were employed to assess the changes in cell proliferation and cell apoptosis in RFWD3, shBIRC5 and shBIRC5+ RFWD3 groups. (C) Colony formation assay was used to evaluate the ability of RKO cells to form colonies in RFWD3, shBIRC5 and shBIRC5+ RFWD3 groups. (D, E) The migration rate of cells was detected in RFWD3, shBIRC5 and shBIRC5+ RFWD3 groups by wound-healing assay (D) and transwell assay (E). The data are expressed as mean  $\pm$ SD. \*  $P < 0.05$ , \*\*  $P < 0.01$ , \*\*\*  $P < 0.001$ .

Supplementary Table 1. Antibodies used in western blotting and IHC.

| Primary antibodies | Dilution in WB | Source species | Company       | Catalog No. |
|--------------------|----------------|----------------|---------------|-------------|
| RFWD3              | 1:500          | Rabbit         | biorbyt       | orb304552   |
| CDK6               | 1:1000         | Rabbit         | abcam         | ab151247    |
| CCND1              | 1:2000         | Rabbit         | abcam         | ab134175    |
| IGFBP3             | 1:500          | Rabbit         | Wuhan Sanying | 10189-2-AP  |
| Bcl-2              | 1:500          | Mouse          | santa cruz    | sc-7382     |
| CASP3              | 1:1000         | Rabbit         | abcam         | ab13847     |
| BIRC5              | 1:1000         | Rabbit         | abcam         | ab469       |
| CCNB1              | 1:3000         | Rabbit         | abcam         | ab32053     |
| CDK1               | 1:1500         | Rabbit         | abcam         | ab133327    |
| CDK4               | 1:1000         | Rabbit         | abcam         | ab108357    |
| E2F1               | 1:50/1:2000    | Mouse          | Proteintech   | 66515-1-Ig  |
| GAPDH              | 1:3000         | Rabbit         | Bioworld      | AP0063      |
| DYKDDDDK Tag       | 1:50/1:1000    | Rabbit         | CST           | 14793       |
| Secondary antibody | Dilution       |                | Company       | Catalog No. |
| Goat Anti-Rabbit   | 1:3000         |                | Beyotime      | A0208       |
| Goat Anti-Mouse    | 1:3000         |                | Beyotime      | A0216       |

  

| Primary antibodies | Dilution in IHC | Source species | Company  | Catalog No. |
|--------------------|-----------------|----------------|----------|-------------|
| RFWD3              | 1:100           | Rabbit         | biorbyt  | orb304552   |
| BIRC5              | 1:200           | Rabbit         | abcam    | ab469       |
| Ki67               | 1:400           | Rabbit         | abcam    | ab6721      |
| Secondary antibody | Dilution        |                | Company  | Catalog No. |
| Goat Anti-Rabbit   | 1:200           |                | Beyotime | A0208       |

Supplementary Table 2. Primers used in qRT-PCR.

| Gene   | Forward primer sequence (5'-3') | Reverse primer sequence (5'-3') |
|--------|---------------------------------|---------------------------------|
| RFWD3  | AGTTGGCGTAGGTGCATTCG            | AGCCATCACTGAAACCAGCA            |
| HDAC4  | CGGACGCCTCTGTTCAACTT            | AGCTCCAAACTCCCACCAA             |
| BIRC5  | TCTCAAGGACCACCGCATCT            | TTTGCATGGGGTCGTCATCT            |
| RAD51  | CAGTGATGTCCTGGATAATGTAGC        | TGTTCTGTAAAGGGCGGTGG            |
| BRCA1  | TGGCAACATACCATCTTCAACC          | TGTCAATTCTGGCTTCTCCCT           |
| CCNB1  | AAACTTTGGTCTGGGTCGGC            | TGCTGCAATTTGAGAAGGAGG           |
| CCNB2  | AAGTTCCAGTTCAACCCACCA           | GCAGAGCAAGGCATCAGAAAA           |
| SKP2   | ATAGAAGTGTCCACCCTCCACG          | CACCCAGAAAGGTTAAGTCGC           |
| CCNE2  | TTGGCTATGCTGGAGGAAGTAA          | TTCAGTGCTCTTCGGTGGTG            |
| CDC25B | GACACGCCCGTGCAGAATAA            | TGGTCACTGTCCAGGAGGTT            |
| CDC25C | GAAACTGGTCACCTGGATTCTTC         | AACCATTTCGGAGTGCTACAAAG         |
| CDK1   | CCATACCCATTGACTAACTAT           | ACCCCTTCCTCTTCACTTTC            |
| TOPBP1 | TGAATCTAACATCGCAAACATC          | CACAGCATAATCCGCAACAG            |
| CDK4   | CTACCAGATGGCACTTACACCC          | GCAAAGATACAGCCAACACTCC          |
| WEE1   | ATTTGATGTGCGACAGACTCCT          | ACTGGCTTCCATGTCTTCACC           |
| CDKN3  | TGTGGAATTATCACCCAT              | TTAAGGCAGGTTGTAAGC              |
| CHEK1  | TTGGCTTGGCAACAGTATTTTCG         | CCAGCGAGCATTGCAGTAAGT           |
| CLSPN  | CTAATCCAGCAGCCAAAC              | TTCCTTTCCATCAGTGCC              |
| E2F1   | CACTTTCGGCCCTTTTGCTC            | GTGCTCTCACCGTCCTACAC            |
| ELAVL1 | AGGGGTGACATCGGGAGA              | GCTGCTGAACAGGCTTCG              |
| FANCD2 | GGCTTGACAGAGTTGTGGATG           | TAGGATCTCAGGTAGGCTGGTG          |
| GAPDH  | TGACTTCAACAGCGACACCCA           | CACCCTGTTGCTGTAGCCAAA           |
